# Supplementary material for: Healthcare professionals’ knowledge, attitude and acceptance of influenza vaccination in Saudi Arabia: a multicenter cross-sectional study
Source: Springer Nature journal article supplement (doi:10.1186/s12913-019-4054-9), 2019-04-15
Supplement: MOESM1 [file 16660438]

## The Health Care Professional's knowledge, Attitude, and Acceptance toward Influenza Vaccines in Saudi Hospitals

Thank you for participation in this study. The aim of this questionnaire is to study the opinion and attitude toward seasonal influenza vaccination, which may help to find solutions aimed to improve influenza vaccination rates among health care professionals in Saudi Arabia

Please be advised that all information will be dealt with in strict confidence and will be used for research purposes only.

Please mark the appropriate box next to your answer choice with an "x". Please answer all of the questions to the best of your ability

### General Information

**1. Gender:**

Male

Female

**2. What is your professional title?**

Physician

Lab specialties

Pharmacist

Other (please specify) \_\_\_\_\_

Nurse

**3. What is your specialty?**

General practice

Geriatrics

Pediatrics

Asthma/Allergies

Family Medicine

Pharmacy

Internal Medicine

Other (please specify) \_\_\_\_\_

OBGYN

**4. What is your practice/center?**

Governmental hospital

Other (please specify) \_\_\_\_\_

Private hospital

### Question measure attitude

**5. Do you routinely get vaccinated against influenza? And if No please check question 6?**

Yes

No

**6. Check which statements pertain to why you do not routinely get the influenza vaccine (check all that apply)**

- |                                                                                                      |                                                                                          |
|------------------------------------------------------------------------------------------------------|------------------------------------------------------------------------------------------|
| <input type="checkbox"/> The vaccine will make you sick                                              | <input type="checkbox"/> The vaccine is more dangerous than the virus                    |
| <input type="checkbox"/> I've never had the flu, so I don't need to get the shot                     | <input type="checkbox"/> I'm young and healthy                                           |
| <input type="checkbox"/> I do all the right things...I wash my hands and cover my mouth when I cough | <input type="checkbox"/> I can't afford to get the flu shot                              |
| <input type="checkbox"/> I've had the flu before, it's no big deal                                   | <input type="checkbox"/> I don't know where to get the flu shot                          |
| <input type="checkbox"/> I don't like needles                                                        | <input type="checkbox"/> The flu vaccine doesn't work                                    |
| <input type="checkbox"/> The flu/flu vaccine is a government conspiracy                              | <input type="checkbox"/> It's just another example of media hype. The flu is no big deal |
| <input type="checkbox"/> The flu is not that serious                                                 | <input type="checkbox"/> It's too late: the flu is already here                          |
|                                                                                                      | <input type="checkbox"/> Other (please specify)                                          |

**Questions measure knowledge**

**7. Do you think the influenza vaccine is effective in preventing the flu?**

- |                              |                             |
|------------------------------|-----------------------------|
| <input type="checkbox"/> Yes | <input type="checkbox"/> No |
|------------------------------|-----------------------------|

**8. Do you believe that Saudi Scientific Committee for Influenza and Pneumococcal Vaccination (SCIPV) recommends that health care workers receive the flu shot?**

- |                                       |                             |
|---------------------------------------|-----------------------------|
| <input type="checkbox"/> Yes          | <input type="checkbox"/> No |
| <input type="checkbox"/> I don't know |                             |

**9. How often do you think the flu vaccine should be administered? Choose one**

- |                                         |                                             |
|-----------------------------------------|---------------------------------------------|
| <input type="checkbox"/> Every 6 months | <input type="checkbox"/> Every 5 years      |
| <input type="checkbox"/> Every year     | <input type="checkbox"/> Once in a lifetime |

**Questions about Practice**

**10. Do you think administering the influenza vaccine should be part of your medical practice?**

- |                              |                             |
|------------------------------|-----------------------------|
| <input type="checkbox"/> Yes | <input type="checkbox"/> No |
|------------------------------|-----------------------------|

**11. Which statement applies to your practice/center regarding influenza vaccine for office staff? (Check only one)**

- |                                                                       |                                                                               |
|-----------------------------------------------------------------------|-------------------------------------------------------------------------------|
| <input type="checkbox"/> We require and offer the influenza vaccine   | <input type="checkbox"/> We require, but do not offer the influenza vaccine   |
| <input type="checkbox"/> We encourage and offer the influenza vaccine | <input type="checkbox"/> We encourage, but do not offer the influenza vaccine |
|                                                                       | <input type="checkbox"/> None of the above                                    |

**12. Why are flu vaccines for health care workers encouraged? (Choose all that apply)**

- |                                                                                                 |                                                                                             |
|-------------------------------------------------------------------------------------------------|---------------------------------------------------------------------------------------------|
| <input type="checkbox"/> To minimize sick days and loss of productivity                         | <input type="checkbox"/> Because sick patients are exposed to the flu by healthcare workers |
| <input type="checkbox"/> Because healthcare workers can get exposed to the flu by sick patients | <input type="checkbox"/> To set an example to other workers                                 |

13. Have you or your staff participated in any training or continuing education related to the influenza vaccine in the past 12 months?

- Yes  No

14. Would you or your staff be interested in participating in training related to the influenza vaccine?

- Yes  No

15. Does your practice/center offer the influenza vaccine to your patients?

- Yes  No

I don't know

16. Does your practice/center have standing orders regarding the influenza vaccine?

- Yes  No

I don't know

17. How do you communicate the importance of getting the influenza vaccine to your patients? (Check all that apply):

- |                                                      |                                                                                                |
|------------------------------------------------------|------------------------------------------------------------------------------------------------|
| <input type="checkbox"/> During office visits        | <input type="checkbox"/> We do not communicate the importance of getting the influenza vaccine |
| <input type="checkbox"/> Telephone calls             | <input type="checkbox"/> Vaccination day                                                       |
| <input type="checkbox"/> Poster or Brochure          | <input type="checkbox"/> Other (please specify)                                                |
| <input type="checkbox"/> Vaccine reminders by e-mail | _____                                                                                          |
| <input type="checkbox"/> Vaccine reminders by text   |                                                                                                |

18. In your opinion, what are some of the barriers that prevent your practice from providing the influenza vaccine to some or all of your patients? (Check all that apply)

- |                                                             |                                                                              |
|-------------------------------------------------------------|------------------------------------------------------------------------------|
| <input type="checkbox"/> Vaccine safety concern (yours)     | <input type="checkbox"/> Staff capacity (limited number of staff)            |
| <input type="checkbox"/> Vaccine safety concerns (patients) | <input type="checkbox"/> Staff capacity (training and readiness)             |
| <input type="checkbox"/> Cost/reimbursement issues          | <input type="checkbox"/> Ancillary supplies (gloves, needles/syringes, etc.) |
| <input type="checkbox"/> Availability                       |                                                                              |
| <input type="checkbox"/> Storage (including refrigeration)  |                                                                              |

**Question measure awareness**

19. Are you aware of the published guidelines Advisory Committee on Immunization Practices (ACIP), Scientific Committee for Influenza and Pneumococcal Vaccination (SCIPV) or CDC for influenza immunization?

- Yes  No

Other (please specify-) \_\_\_\_\_

| Questions                                                                                                              | Correct | Incorrect | Not sure |
|------------------------------------------------------------------------------------------------------------------------|---------|-----------|----------|
| Health care professionals( HCPs) are less susceptible to influenza infections than other people                        |         |           |          |
| Influenza is transmitted primarily by coughing and sneezing                                                            |         |           |          |
| Influenza is more serious than a “common cold”                                                                         |         |           |          |
| The signs and symptoms of influenza include fever, headache, sore throat, cough, nasal congestion, and aches and pains |         |           |          |
| HCPs can spread influenza even when they are feeling well                                                              |         |           |          |
| People with influenza can transmit the infection only after their symptoms appear                                      |         |           |          |
| Influenza is transmitted primarily by contact with blood and body fluids                                               |         |           |          |
| Influenza vaccination may not work if the vaccine contains the wrong mix of viruses                                    |         |           |          |
| The flu shot contains live viruses that may cause some people to get influenza                                         |         |           |          |
| Influenza vaccination does not work in some persons, even if the vaccine has the right mix of viruses                  |         |           |          |
| Adults with influenza commonly experience nausea and vomiting or diarrhea                                              |         |           |          |
| Symptoms typically appear 8 to 10 days after a person is exposed to influenza                                          |         |           |          |

THANK YOU....
